# Supplementary material for: Adsorption-based atmospheric water harvesting device for arid climates
Source: PubMed Central journal article supplement (PMC5864962; doi:10.1038/s41467-018-03162-7), 2018-03-22
Supplement: 41467_2018_3162_MOESM2_ESM.pdf [file 41467_2018_3162_MOESM2_ESM.pdf]

## **Description of Additional Supplementary Files**

**File Name: Supplementary Movie 1**

**Description:** Water harvesting cycle 2.

**File Name: Supplementary Movie 2**

**Description:** Water harvesting cycle 3.
